# 1 Keystone species determine the productivity of synthetic microbial 2 biofilm communities

3 Xinli Sun<sup>1, 2</sup>, Jiyu Xie<sup>1</sup>, Daoyue Zheng<sup>1</sup>, Riyan Xia<sup>1</sup>, Wei Wang<sup>1</sup>, Weibing Xun<sup>1</sup>, Qiwei Huang<sup>1</sup>, Ruifu  
4 Zhang<sup>1</sup>, Ákos T. Kovács<sup>2\*</sup>, Zhihui Xu<sup>1\*</sup>, Qirong Shen<sup>1</sup>

5 <sup>1</sup> Jiangsu Provincial Key Lab of Solid Organic Waste Utilization, Jiangsu Collaborative Innovation  
6 Center of Solid Organic Wastes, Educational Ministry Engineering Center of Resource-Saving  
7 Fertilizers, The Key Laboratory of Plant Immunity, Nanjing Agricultural University, 210095 Nanjing,  
8 Jiangsu, Peoples R China

9 <sup>2</sup> Bacterial Interactions and Evolution Group, DTU Bioengineering, Technical University of Denmark,  
10 2800 Kongens Lyngby, Denmark

11 Xinli Sun and Jiyu Xie contributed equally to this work.

12 \*Corresponding authors: Zhihui Xu and Ákos T. Kovács

13 E-mail: xzh2068@njau.edu.cn, atkovacs@dtu.dk

14

## 15 Abstract

16 Microbes typically reside in multi-species communities, whose interactions have considerable  
17 impacts on the robustness and functionality of such communities. To manage microbial  
18 communities, it is essential to understand the factors driving their assemblage and maintenance.  
19 Even though the community composition could be easily assessed, interspecies interactions during  
20 community establishment remain poorly understood. Here, we combined co-occurrence network  
21 analysis with quantitative PCR to examine the importance of each species within synthetic  
22 communities (SynComs) of pellicle biofilms. Genome-scale metabolic models and *in vitro*  
23 experiments indicated that the biomass of SynComs was primarily affected by keystone species that  
24 are acting either as metabolic facilitators or as competitors. Our study sets an example of how to  
25 construct a model SynCom and investigate interspecies interactions.

## 26 Introduction

27 Despite a wealth of information available on the microbiota composition gathered from sequencing  
28 techniques, little is known about the interspecies interactions that govern their assemblage and  
29 dynamics. Yet, the size and complexity of natural microbial communities are often too large to be  
30 manipulated. Synthetic microbial communities (SynComs) have been proposed as model systems  
31 to overcome these challenges (Großkopf and Soyer, 2014). Several SynComs with moderate

32 complexity and high controllability have been developed to represent different natural environments,  
33 such as plant rhizosphere (Bai et al., 2015; Ma et al., 2021; Niu et al., 2017; Schmitz et al., 2022;  
34 Voges et al., 2019), phyllosphere (Berg and Koskella, 2018; Carlström et al., 2019), and intestine  
35 (Hromada et al., 2021; Ortiz et al., 2021; Weiss et al., 2021). In nature, most bacteria aggregate as  
36 sessile multicellular communities that are embedded in the self-produced extracellular matrix called  
37 biofilm (Flemming and Wuertz, 2019; Webb et al., 2003). Biofilm communities have emergent  
38 properties that are not predictable from free-living bacterial cells (Flemming et al., 2016), including  
39 enhanced biomass production (Ren et al., 2015), stress tolerance (Lee et al., 2014; Orazi and  
40 O'toole, 2019), and improved resource acquisition (Nielsen et al., 2000). The spatial organization of  
41 biofilms facilitates the intermixing of cooperating species and spatial segregation of competing  
42 species (Nadell et al., 2016). Understanding how bacterial interactions affect the assemblage of  
43 bacterial communities has direct applications in biotechnology, agriculture, and health (Bengtsson-  
44 Palme, 2020; Cavaliere et al., 2017; Cho and Blaser, 2012; Fitzpatrick et al., 2020; Gómez-Godínez  
45 et al., 2021).

46 Studies on SynComs reported that the assemblage and robustness of communities can be affected  
47 by several factors including pH (Ortiz et al., 2021), temperature (Burman and Bengtsson-Palme,  
48 2021), spatial distribution (Liu et al., 2019), initial abundance (Gao et al., 2021), niche specificity  
49 (Estrela et al., 2021), nutrient availability (Ratzke et al., 2020), and keystone species (Niu et al.,  
50 2017). Five principles need to be considered when developing SynComs: representativity, stability,  
51 reduced size, accessibility, and tractability (Blasche et al., 2017). To assemble a representative and  
52 stable SynCom, microbial co-occurrence network analysis could serve as guidance for the selection  
53 of isolates (Poudel et al., 2016). Positive or negative associations indicate candidate taxa. This  
54 method has been applied to investigate factors affecting host microbiome variation (Aglar et al.,  
55 2016), to link taxa to biological functions of interest (Wei et al., 2019), to identify potential biotic  
56 interactions (Durán et al., 2018), and to explore habitat differentiation (Barberán et al., 2012).  
57 However, the ecological relevance of predicted interactions remains poorly understood (Faust,  
58 2021). The connectedness and strength of positive or negative interactions are not experimentally  
59 verified. Another emerging method for exploring microbial interactions is genome-scale metabolic  
60 modeling, which can provide insights into metabolic interaction potential and metabolic resource  
61 overlap in multi-species communities (Zelezniak et al., 2015a; Zorrilla et al., 2021). Accessibility and  
62 tractability require a community to contain limited members, and the community members are  
63 cultivatable and can be promptly and accurately quantified. This can be achieved by colony-forming  
64 unit (CFU) counting (Niu et al., 2017; Piccardi et al., 2019), fluorescent labeling (Kehe et al., 2021),  
65 and quantitative PCR (Ren et al., 2015). While CFU counting is simple to employ but time-  
66 consuming, the latter two approaches are more efficient but require extensive initial preparation time  
67 and effort. Reduced size permits the manipulability of a SynCom.

68 In this study, we constructed multi-species biofilm communities using isolates from a rhizosphere  
69 and predicted their interactions by analyzing co-occurrence networks. We evaluated the role each  
70 member played in community productivity and its impact on the other members of the community.  
71 The potential metabolic interactions were further investigated through experiments and metabolic  
72 modeling. Our results suggested that keystone species determine community productivity, probably  
73 through metabolic exchanges or resource competition. We propose that our study could inform the  
74 rational design of synthetic communities.

## 75 Results

### 76 Source of SynCom members

77 As co-existence facilitates biofilm formation in multi-species communities (Madsen et al., 2016), we  
78 adopted co-existence as the first criterion of SynCom selection. To assemble a soil biofilm  
79 community, we co-cultured the rhizosphere soil with *Bacillus velezensis* SQR9 (a strong biofilm  
80 former widely studied in our lab, abbreviated as Bac) to form pellicle biofilms (Figure 1—figure  
81 supplement 1A). We determined the bacterial composition of the biofilm and the solution  
82 underneath using the amplicon sequencing method. Consequently, 15 genera and 2 families were  
83 predicted to co-exist in the culture condition (Figure 1—figure supplement 1B). From our bacterial  
84 collection (Sun et al., 2021), we selected 11 isolates that corresponded with the predicted co-  
85 existing taxa to represent the soil biofilm community (Figure 1—figure supplement 2). These isolates  
86 are derived from three different phyla: Firmicutes, Proteobacteria, and Bacteroidetes.

87

88

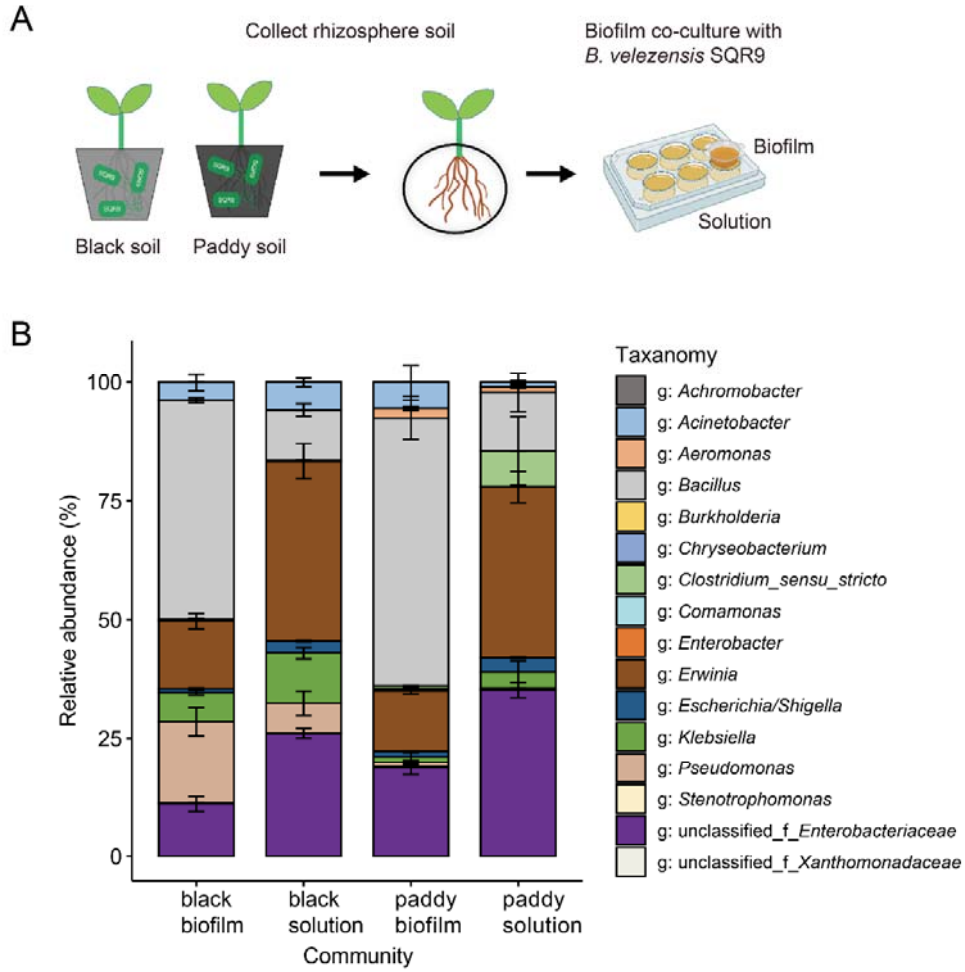

**Figure 1—figure supplement 1.** Origin of the initial 11 isolates. **(A)** Schematic diagram of the experimental setup. Rhizospheric black soil and paddy soil were collected from cucumber plants. The soil microbiota were co-cultivated with *B. velezensis* SQR9 at 30°C in TSB medium to form pellicle biofilms. After 24 hours of cultivation, the pellicle and the solution underneath were collected separately. The samples were sent for 16S rDNA amplicon sequencing. **(B)** Microbiome composition of the biofilm and solution. Data presented are the mean  $\pm$  sd. n = 3. Based on OTU clustering and the RDP database taxonomic classification, 15 genera and 2 families were identified. Eleven matching isolates were selected from our laboratory bacteria collection (Sun et al., 2021).

89

90

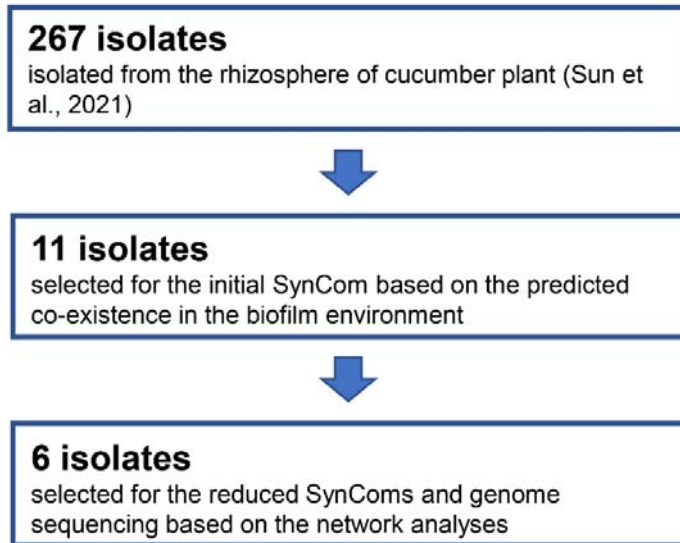

91 **Figure 1—figure supplement 2.** A flow chart of isolates used for the study, their origin and selection criteria.

92 Generally, biofilm development undergoes various stages including initial motility, development,  
93 maturation, and disassembly (Vlamakis et al., 2013). To evaluate the stability of the SynCom, we  
94 expanded the volume of cultivation to 400 ml and tracked the dynamic changes of bacterial  
95 composition: development (2d), early maturation (4d), late maturation (6d), and disassembly (8d).  
96 The bacterial composition stabilized at the maturation stages. Chr (*Chryseobacterium rhizoplane*)  
97 was identified to be the most predominant member followed by Aci (*Acinetobacter baumannii*) as  
98 the second most abundant species throughout the biofilm formation process (Figure 1A). Three  
99 isolates Ach (*Achromobacter denitrificans*), Pxa (*Pseudoxanthomonas japonensis*), and Ste  
100 (*Stenotrophomonas maltophilia*) rapidly declined and could not establish themselves during biofilm  
101 maturation (4d & 6d). At the biofilm disassembly stage (8d), the sticky, robust biofilm structure has  
102 dispersed as small, fragile aggregates. Most cells have lysed, thus the relative abundance of rare  
103 isolates increased.

104 We hypothesized that microbial interactions could contribute to the compositional changes.  
105 Therefore, network co-occurrence analysis was employed to infer the correlations (Spearman's  
106 correlation coefficient  $r > 0.6$ ,  $p < 0.01$ ) among the species during biofilm formation (Figure 1B). Co-  
107 occurrence network revealed 9/14 positive correlations and 5/14 negative correlations. Intriguingly,  
108 the negative correlations all involve Chr, suggesting that the increment of Chr is linearly correlated  
109 with the reduction of other isolates. Aci, Bac, and Bur (*Burkholderia contaminans*) had no  
110 connection with others, indicating that they had little influence on the growth of other isolates (Figure  
111 1B). The connectedness of isolates was further evaluated by node degree and closeness centrality  
112 (Figure 1C). Node degree is the number of edges the node has. The higher the degree, the more  
113 central the node is. High closeness centrality indicates the node is closely connected to other nodes

114 and is central in the network. As a result, six isolates - Chr, Ste, Com (*Comamonas odontotermitis*),  
 115 Pan, Ent (*Enterobacter bugandensis*), Pxa - are closely connected with other isolates and are  
 116 central in the network. Ach and Pse are closely connected with other nodes but not central in the  
 117 network.

118 In the subsequent experiments, we selected six isolates to examine bacterial interaction. They were  
 119 selected based on high relative abundance (Chr, Aci) or high closeness centrality (Pan, Com, Ent,  
 120 Pxa, Pse). Chr fulfilled both criteria and was hypothesized as the keystone negative species in the  
 121 reduced SynCom. Other species were excluded either due to their extremely low abundance at the  
 122 biofilm maturation stage (Ach, Pxa, Ste), or due to the lack of correlations with the other species  
 123 (Bac, Bur).

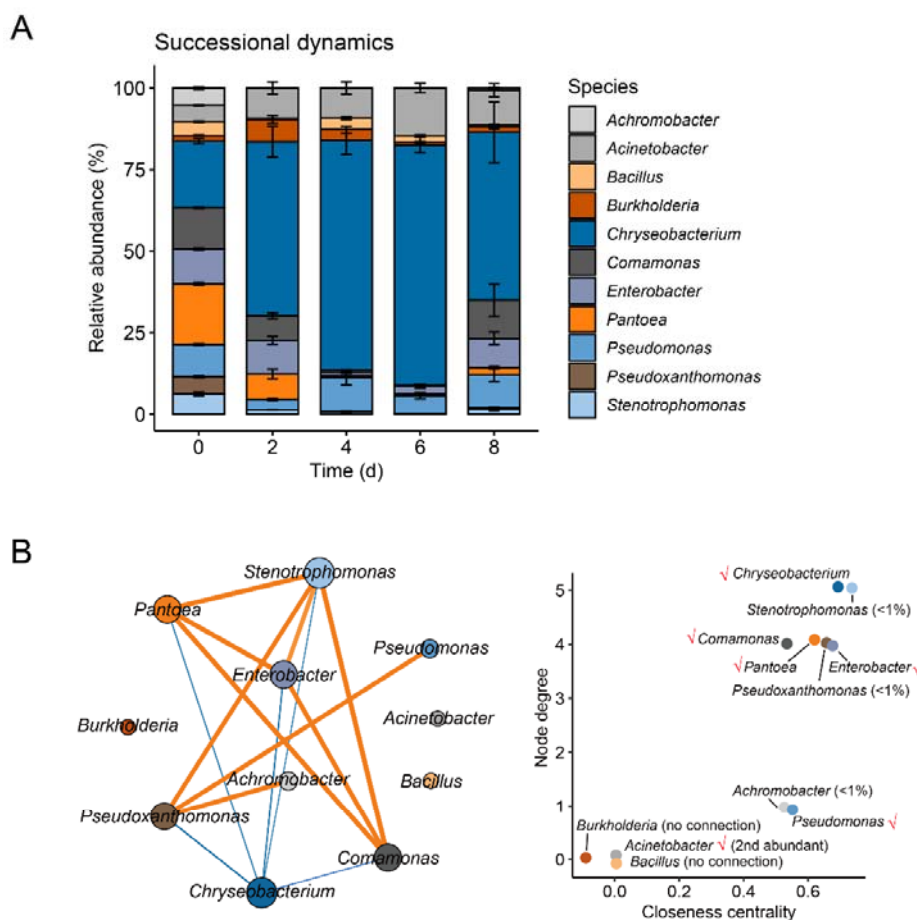

**Figure 1.** Dynamic changes of the initial 11-species consortium composition in the biofilm. **(A)** The relative abundance of isolates determined by 16S rRNA gene amplicon sequencing method. Data presented are the mean  $\pm$ sd. n =8. **(B)** Co-occurrence network of bacteria within biofilm communities. Each node represents a bacterial species, node size is proportional to node degree. Line width indicates the interactive strength of interaction, and color indicates the sign of correlation (orange indicates positive, blue indicates negative). A positive correlation means that as one isolate increase, the other isolate also tends to increase, and vice versa. **(C)** Selection of six isolates. Node degree is the number of direct correlations to a node in the network. Closeness centrality indicates the average distance from a given starting node to all other nodes in the network. Ticks indicate isolates selected in the following reduced community. These isolates were selected based on either high abundance or high correlations as indicated by node degree and closeness centrality.

**Figure supplement 1.** Origin of the initial 11 isolates.

**Figure supplement 2.** A flow chart of isolates used for the study, their origin and selection criteria.

125 **The productivity of multi-species biofilm was affected by central nodes**

126 The co-occurrence network suggested Pan, Com, and Ent are positively correlated with each other,  
127 while they are all negatively correlated with Chr. Aci and Pse are not connected with the selected  
128 nodes. We hypothesized that the removal of central nodes (Pan, Com, Ent, Chr) would have a  
129 significant impact on community structure and productivity, while the removal of non-connected  
130 nodes (Aci, Pse) would have no impact. To evaluate the importance of each isolate on biofilm  
131 productivity, we applied the “Removal” strategy: the “Full” community consists of six isolates, then  
132 one isolate was dropped out to obtain the five-species reduced communities, abbreviated as “Rm”  
133 communities. Biofilm productivity was assessed in two ways: fresh weight and population cell  
134 numbers (Figure 2A). We minimized the volume of biofilm cultivation to 10 ml to allow massive  
135 parallel sampling of the different combinations. Importantly, the smaller volume shortened the  
136 biofilm development time, thus two earlier time points were tested: 24h represents the biofilm  
137 development stage, while 36h represents the maturation stage. The cell numbers were quantified by  
138 strain-specific primers (Table 1). The role of each isolate is represented as changes in community  
139 productivity by removing the certain isolate from the full community.

140 “Rm Chr” resulted in higher biofilm weight and higher community cell numbers at both time points  
141 (ANOVA, Tukey’s test,  $p < 0.05$ ) (Figure 2B & Figure 2 – figure supplement1). Conversely, “Rm Pan”  
142 led to lower biofilm weight at 24h and lower community cell numbers at 36h. Removal of the other  
143 two positive nodes (Com and Ent) did not result in the same effect. These partly confirmed our  
144 predictions: the negative node Chr and the positive node Pan affect the carrying capacity of  
145 SynCom. Besides, the removal of non-connected nodes (Aci and Pse) had little impact on  
146 community productivity, which also supports our hypothesis. The contradictory effect of “Rm Ent” on  
147 weight and cell numbers at 24h made it difficult to assign a clear role.

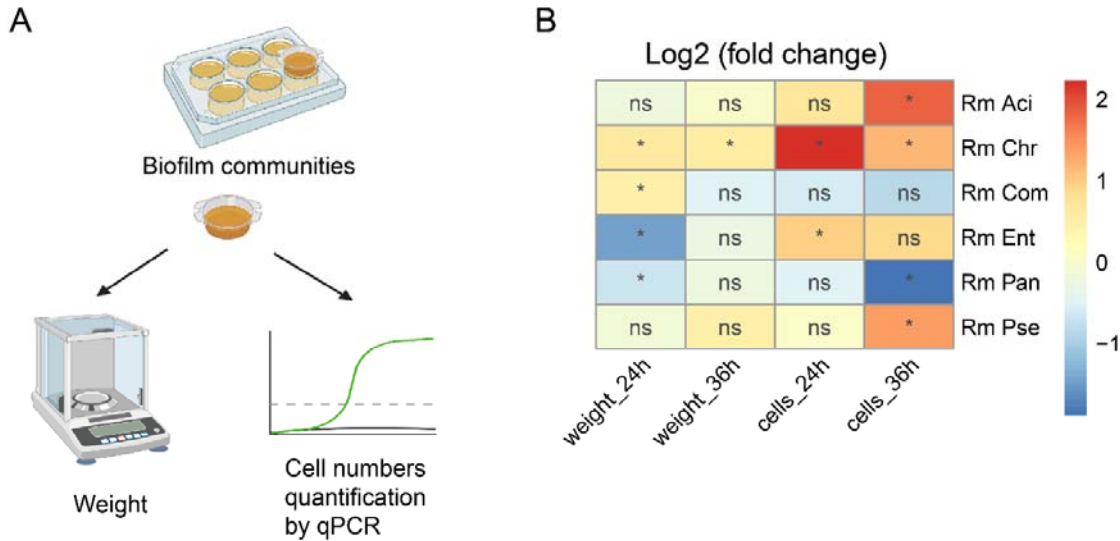

**Fig 2** Productivity of the reduced SynComs. **(A)** Experimental design. **(B)** Changes in biofilm weight and population cell numbers. “\*\*\*” indicates the value of the reduced community is significantly changed compared with the “Full” community (ANOVA, Tukey’s test,  $p < 0.05$ ). Values of the replicates are shown in figure supplement 1. Rm Aci, Rm Chr, Rm Com, Rm Ent, Rm Pan, Rm Pse represent the five-species communities resulting from the removal of *Acinetobacter baumannii* XL380, *Chryseobacterium rhizoplanae* XL97, *Comamonas odontotermitis* WLL, *Enterobacter bugandensis* XL95, *Pantoea eucrina* XL123 and *Pseudomonas stutzeri* XL272, respectively.

**Figure 2 – figure supplement1.** Productivity of the reduced SynComs.

148

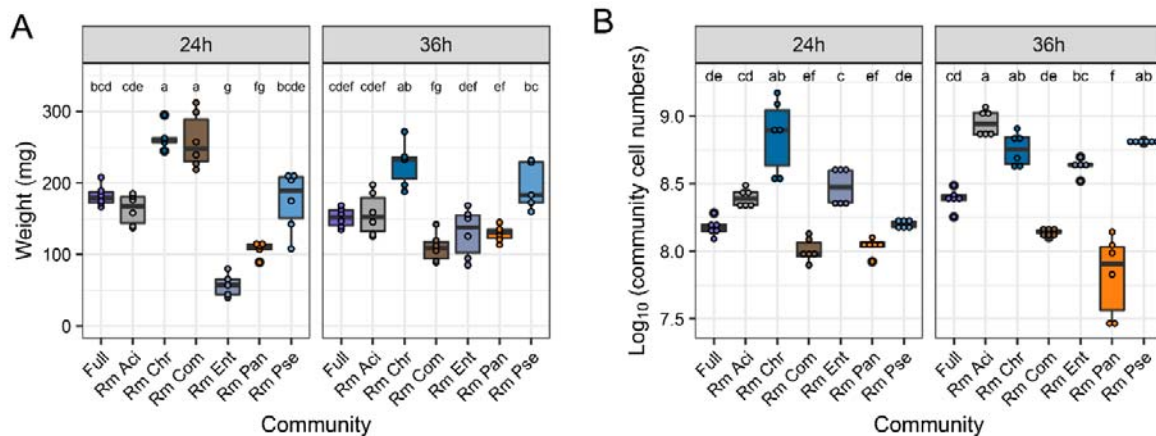

**Figure 2—figure supplement.** Productivity of the reduced SynComs. **(A)** Biofilm weight. **(B)** Cell numbers. Different letters indicate significant difference by one-way ANOVA, Tukey’s test. Data presented are the mean  $\pm$  sd.  $n = 6$ .

149

150 We also compared the individual cell numbers in the reduced SynComs with that in the “Full”  
 151 community to evaluate the impact of removing one isolate on other isolates ([Figure 3& Figure 3 –](#)  
 152 [figure supplement](#)). In general, most community members increased after the removal of Aci, Chr,  
 153 or Pse, suggesting their presence of them inhibited the growth of other isolates in the SynCom. “Rm  
 154 Pan” resulted in the reduction of Chr, Com, and Pse at 36h, suggesting Pan was important for  
 155 supporting their growth at the biofilm maturation stage. “Rm Ent” also increased the cell numbers of  
 156 Pan, indicating Pan was negatively correlated with Ent, which contradicted with co-occurrence  
 157 network.



158 Taken together, we proposed Chr as a keystone negative species in the SynCom in terms of limiting  
 159 the community productivity and inhibiting the growth of every other isolate in the community context.  
 160 Pan is predicted to be a positive keystone species because its removal decreased the growth of  
 161 three members and decreased the overall community productivity.

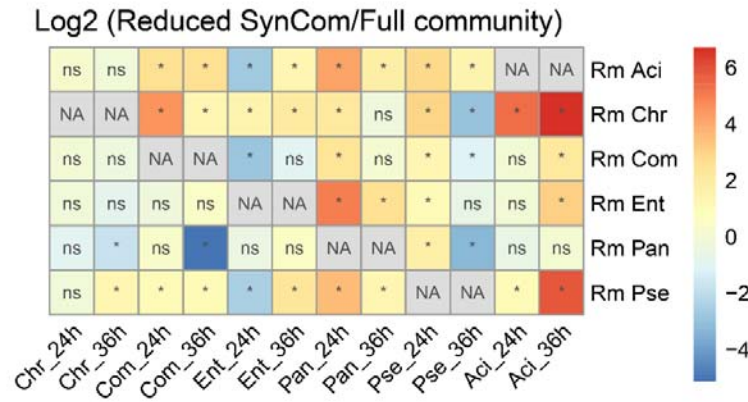

**Fig 3** Influence of removing one isolate on SynCom composition. "\*" indicates the cell numbers of the isolate in the reduced community is significantly changed compared with that in the "Full" community (ANOVA, Tukey's test,  $p < 0.05$ ). Values of the replicates are shown in figure supplement.

**Figure 3 – figure supplement.** Individual cell numbers in different SynComs.

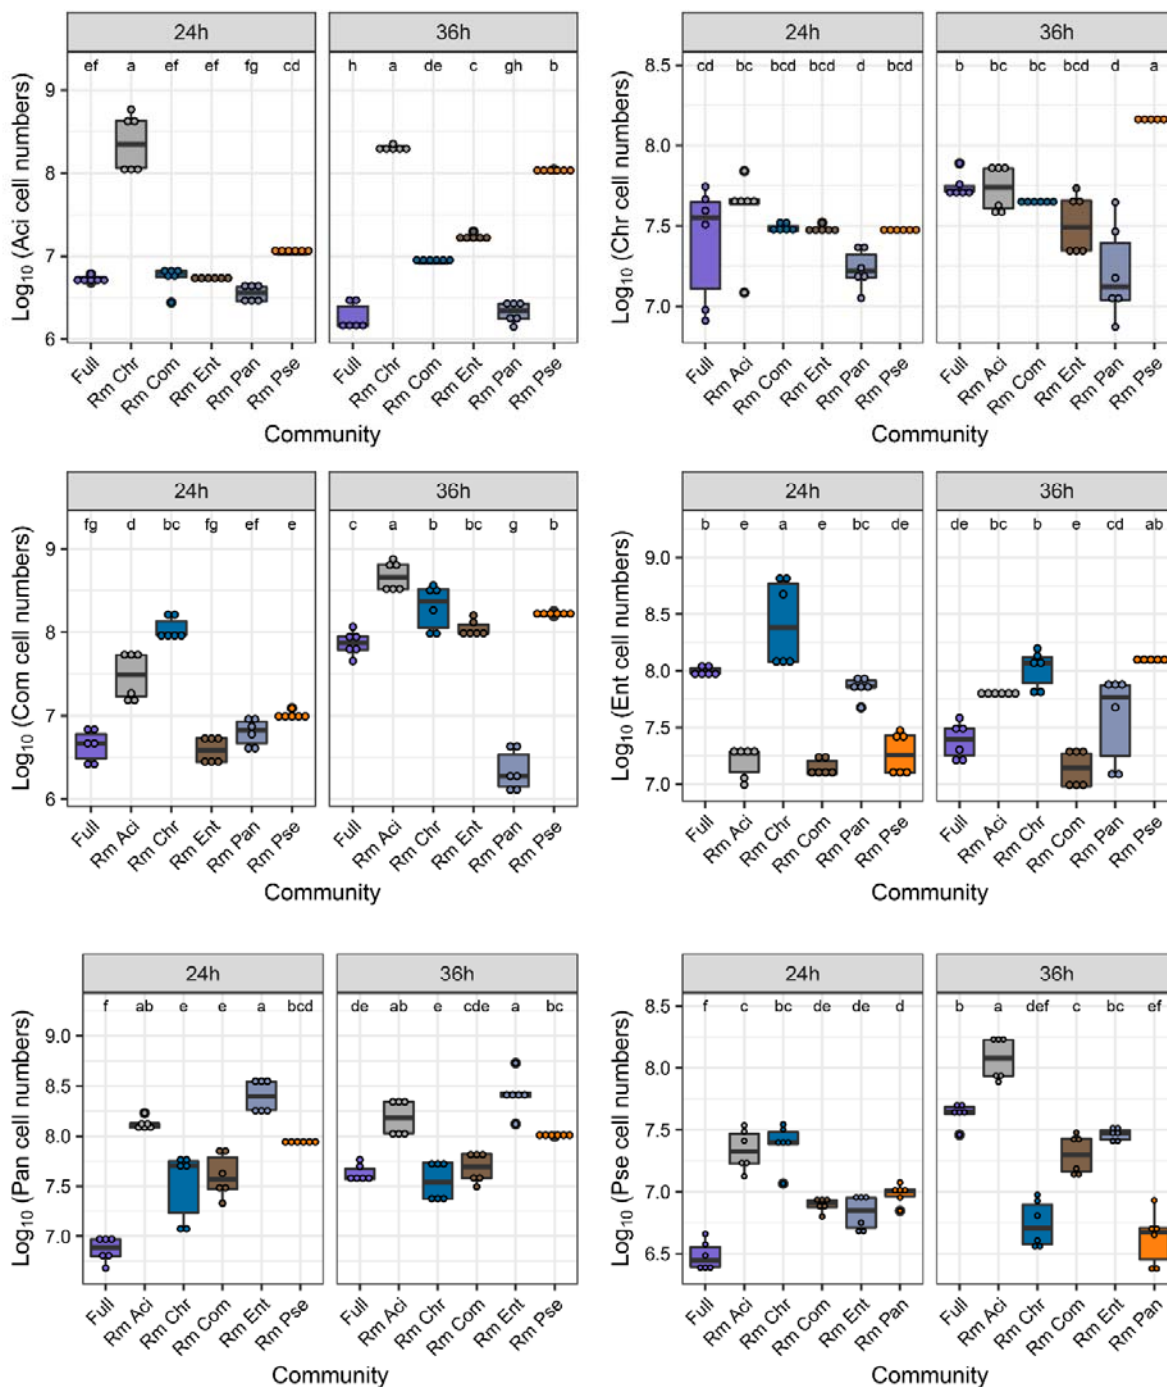

**Figure 3—figure supplement.** Individual cell numbers in different SynComs. Different letters indicate significant difference by one-way ANOVA, Tukey's test. Data presented are the mean  $\pm$  sd.  $n=6$ .

163

164 [Metabolic facilitation could explain the positive interaction](#)

165 To gain insights into the metabolic interaction potential of the SynCom members, genome-scale  
 166 metabolic models were established using the CarveMe pipeline. The M9 glucose minimal medium  
 167 was set as the input medium because this medium can be experimentally validated and due to lack  
 168 of available metabolic modeling pipeline for complex growth media, such as TSB. We derived the

169 likely exchanged metabolites across communities and the strength of metabolic coupling -  
170 SMETANA score (Zelezniak et al., 2015). In the “Full” community, Pan served as the principal  
171 metabolic donor, all the other isolates received benefits from it (Figure 4A). On the contrary, Chr  
172 acted as the highest metabolic receiver, while Pan had the least potential to be the metabolic  
173 receiver. Amino acids, organoheterocyclic compounds, and phosphate were the major exchanged  
174 metabolites (Figure 4B). Aci and Com mainly receive amino acids from Pan, Chr, and Ent receive  
175 organoheterocyclic compounds from Pan, while Pse receives organoheterocyclic carbohydrates  
176 from Pan (Figure 4C).

177 Growth assays were used to determine the accuracy of the metabolic models. Firstly, only four  
178 isolates were able to grow individually in the M9 medium with 0.2% glucose as sole carbon: Ent and  
179 Pse displayed high growing capacity, Aci and Pan grew moderately, while Chr and Com showed no  
180 growth (Figure 4 – figure supplement). Therefore, Ent, Pse, Aci, and Pan could have the potential to  
181 serve as metabolic donors in the M9 glucose medium. Secondly, growth in the spent culture  
182 medium was utilized to determine metabolic interaction potential. Each isolate was cultured in the  
183 M9 glucose medium until glucose was undetectable. The obtained sterile spent medium was used  
184 to cultivate every other member of the community and themselves. The maximum growing capacity  
185 was determined and defined as growth facilitation (Figure 4D). The spent medium of Pan was  
186 capable of supporting the growth of Aci, Chr, Ent, and Pse (Figure 4 & Figure 4 – figure  
187 supplement). These results might explain the positive role of Pan in the biofilm community. On the  
188 contrary, no isolates could grow in the metabolic by-products of Aci, Ent, or Pse. Chr could be a  
189 strong competitor for the metabolic by-products from Pan in SynCom.

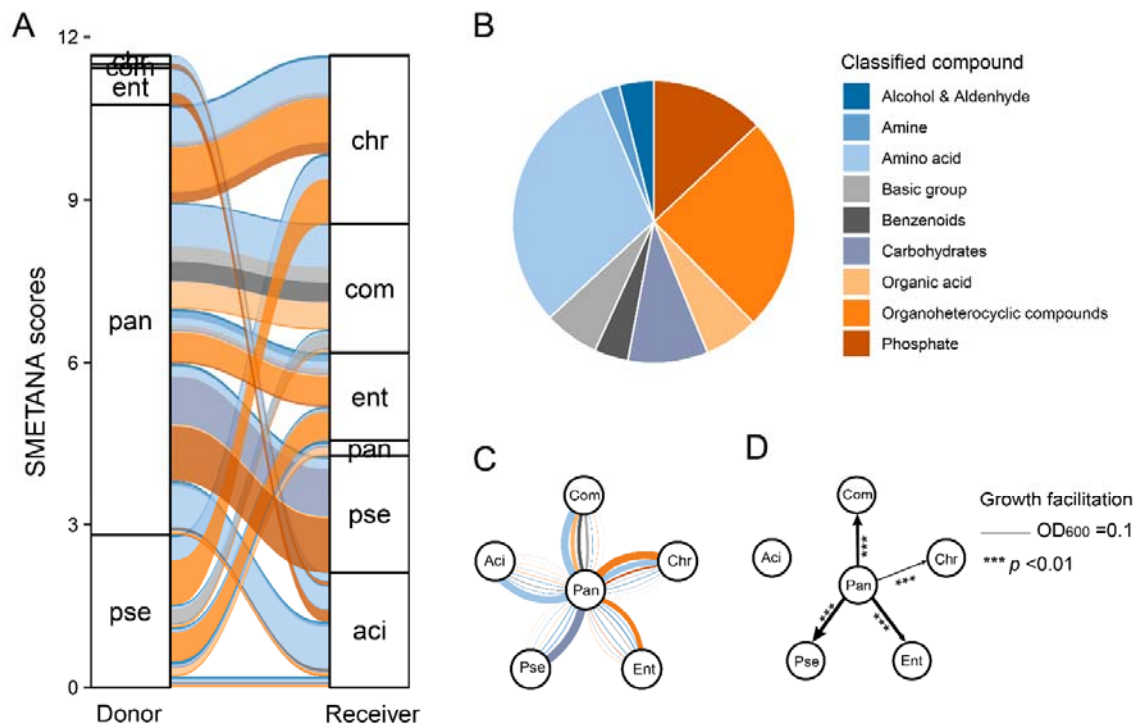

**Fig 4** Metabolic facilitation. (A) Alluvial diagram showing the metabolic interaction potential of the "Full" community simulated by genome-scale metabolic modelling. Thickness of strips are SMETANA scores. (B) Pie chart showing the proportion of compounds exchanged within communities. (C) Flower plot showing metabolic interactions involving *P. eucrina* XL123 (centered in each panel) as a donor. Thickness of lines are proportional to magnitude of SMETANA score. Colors of all plots are the classification of compounds. (D) Growth facilitation assessed by growth in spent medium. The spent medium was prepared by growing the corresponding species in M9 medium with 0.2% glucose till the glucose was under detection then filter sterilized. The species were grown in the filtered spent medium for 24 h and the growth were measured as the  $OD_{600}$ . Line width indicates the growth facilitation, that is the final  $OD_{600}$  subtract the initial  $OD_{600}$ . Only growth facilitation larger than 0.1 were shown in the figure. The values were compared with that of no inoculation control.  $***p < 0.01$ , t test. **Figure 4 – figure supplement.** Growth curves in the M9 spent medium.

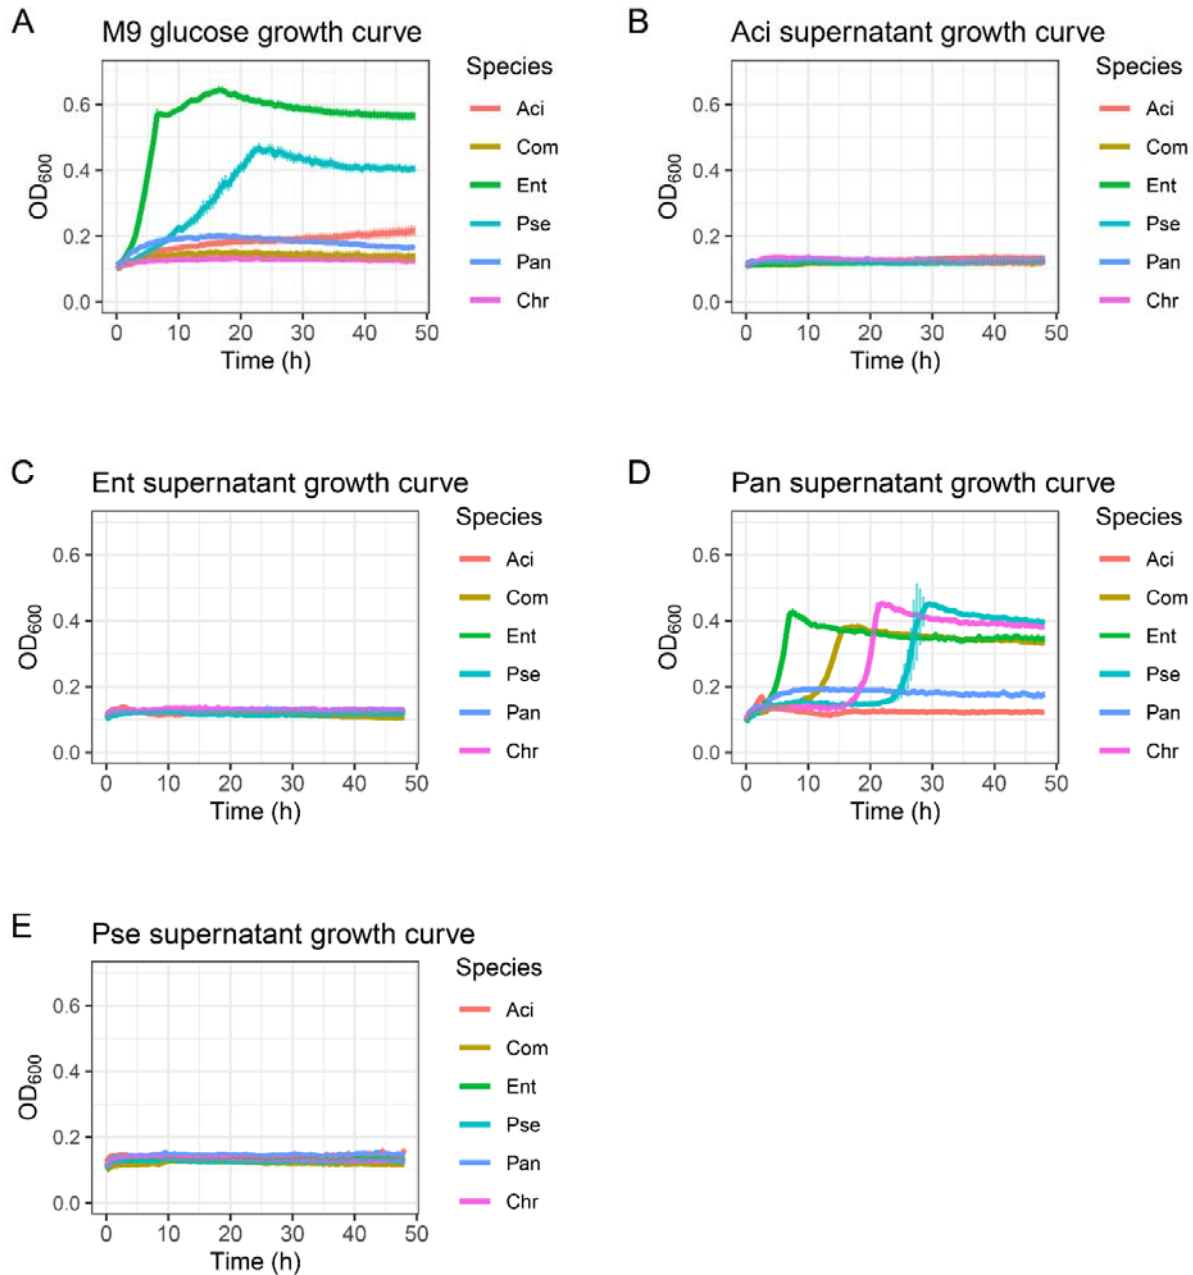

**Figure 4—figure supplement.** Growth curves. (A) Growth curves in M9 medium with 0.2% glucose as carbon source. Water was set as control inoculation. (B) Growth curves in Aci spent medium. (C) Growth curves in Ent spent medium. (D) Growth curves in Pan spent medium. (E) Growth curves in Pse spent medium. Data presented are the mean  $\pm$ sd. n = 5.

191

192

193 [Resource competition could explain the negative interaction](#)

194 Interspecies interactions in the SynComs may further be explained by metabolic competition. Using  
195 metabolic modeling, the metabolic resource overlap was simulated (Figure 5A). We observed high  
196 metabolic resource overlap across all communities, indicating intense resource competition among

197 SynCom members. The removal of Chr minimized the metabolic resource overlap the removal of  
198 Pan or Pse resulted in higher resource competition. To test the possibility of direct competition, we  
199 performed spot-on-lawn and pair-wise spot assays on TSB agar plates ([Figure 5B-C](#)). Both Aci and  
200 Ent completely inhibited the growth of Com. Similarly, Chr and Ent inhibited Pse growth. However,  
201 these inhibitions were not caused by direct antagonism as no inhibition zones were observed in the  
202 respective spot-on-lawn assay plates ([Figure 5B, red square](#)). In addition, no clear boundary was  
203 observed between the two strains when they were spotted adjacent to one another ([Figure 5C](#)).  
204 Interestingly, Pan and Ent could change the colony color of Chr from light yellow to white ([Figure 5B,](#)  
205 [yellow square](#)).

206 We also assessed the carbon source metabolic ability by high-throughput phenotypic microarrays  
207 ([Figure 5D](#)). Ent and Pan were generalists that can utilize a wide variety of carbon sources. Other  
208 community members specialized in using amino acids and organic acids as carbon sources while  
209 having a limited ability to utilize nucleotides, sugar alcohols, and sugars. In the TSB medium, Ent  
210 and Chr had the highest growth rate and growth capacity than other isolates ([Figure 5 – figure](#)  
211 [supplement](#)), suggesting the high competitiveness of these two strains. Collectively, resource  
212 competition was widespread among SynCom members.

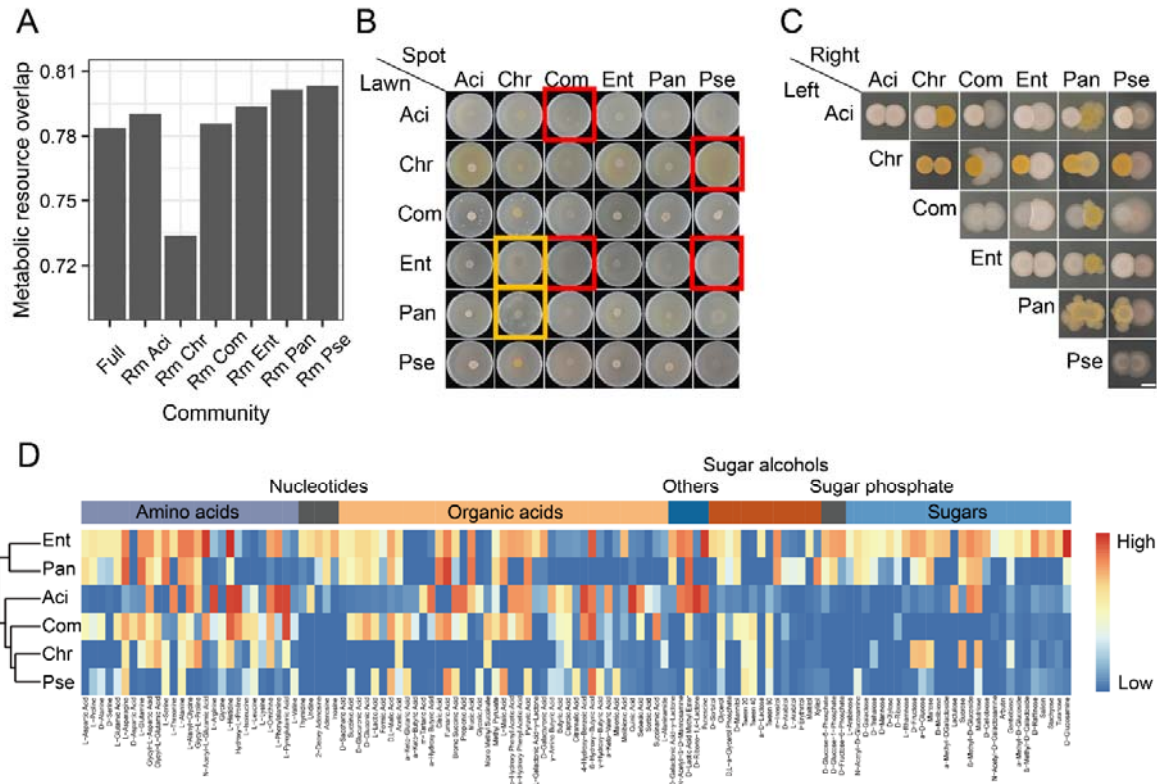

**Fig 5** Resource competition. (A) Bar chart showing the metabolic resource overlap simulated by the metabolic modeling. (B) Spot-on-lawn assays. The lawn species were spread on TSB agar plates at an  $OD_{600}$  of 0.02 and dried, 5  $\mu$ l of the spot species were spotted on the center at an  $OD_{600}$  of 0.4. The plate diameter is 6 cm. Photos were taken after 48 h incubation at 30°C. (C) Pair-wise spot assays. 5  $\mu$ l of the two species were plot next to each other at an  $OD_{600}$  of 1. Scale bar represents 3 mm. Photos were taken after 48 h incubation at 30°C. (D) Carbon source metabolic ability measured by phenotype microarrays. **Figure 5 – figure supplement.** Growth curves in TSB medium.

213

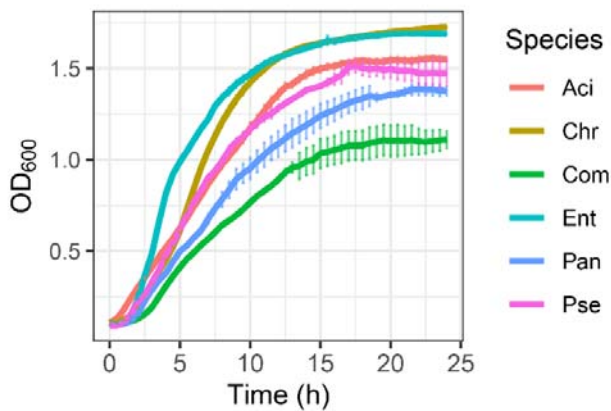

214

**Figure 5—figure supplement.** Growth curves in TSB medium. Data presented are the mean  $\pm$ sd. n =5.

## 215 Discussion

216 A key concern in SynCom research is to understand how microbial interactions affect community  
 217 composition and productivity. In our study, we evaluated the contribution of each individual to

218 community productivity and revealed the metabolic interactions. Our SynCom system identified Pan  
219 (*P. eucriana*) and *Chr* (*C. rhizoplanae*) as important drivers of community interaction networks  
220 through metabolic cross-feeding and resource competition. Subsequently, we predicted bacterial  
221 interactions by co-occurrence network analysis and tested the interactions in reduced communities.

222 Manipulating microbial consortia has a variety of applications; however, attempts to engineer them  
223 often fail to achieve the expected results owing to the unexpected effects of interactions within the  
224 community. To assemble a stable community, three main criteria should be considered: natural co-  
225 occurrence, tractability, and stability. Firstly, to represent a natural co-occurrence, the community  
226 should contain members that also co-exist in natural settings. Natural co-occurrence ensures a  
227 higher possibility of stable co-existence as well as higher natural relevance than artificial  
228 combination of isolates with unrelated origin. The model maize community (Niu et al., 2017), SXMP  
229 soil community (Ren et al., 2015), THOR community (Lozano et al., 2019), metal working fluids  
230 community (Piccardi et al., 2019), cheese rind community (Wolfe et al., 2014), and Yeast-LAB  
231 community (Ponomarova et al., 2017) were all constructed based on this criterium. Multiple species  
232 co-occurring in the natural microbiome could be pooled together to assemble an initial community.  
233 We assembled the initial community based on soil co-occurrence and co-existence in a laboratory  
234 biofilm. The second criterium is tractability. All the community members should be easily tractable  
235 by colony counting or qPCR, and the community should have an easily tractable trait, such as  
236 biofilm productivity. The third premise is a reduced community size. Species that cannot establish  
237 themselves in the initial community or species that share similar genetic backgrounds can be  
238 omitted from the community. The stability of a reduced community, the ability to maintain all the  
239 isolates, should be tested again at select time points of assembly. In this study, the community  
240 composition was tested by strain-specific qPCR. The reduced community was determined by  
241 network analysis and abundance: six correlated or abundant isolates were selected from the initial  
242 community.

243 We tested the positive or negative roles of the isolates as predicted by network analysis through the  
244 so-called removal strategy (where certain members were removed from the SynCom). Only 4 of the  
245 6 isolates exhibited a predicted influence on community productivity. Therefore, although a co-  
246 occurrence network could serve as the first step for predicting bacterial interactions, this approach is  
247 insufficient for conclusively identifying keystone species and therefore requires experimental  
248 validation (Carlström et al., 2019; Faust, 2021). The removal strategy could be used to verify the  
249 role of the keystone species (Carlström et al., 2019; Niu et al., 2017).

250 After these three steps, further properties can be assessed according to the research interest, e.g.,  
251 plant-growth-promoting properties, toxic fluid degrading ability, and stress resistance (Lee et al.,  
252 2014; Niu et al., 2017; Piccardi et al., 2019; Wang et al., 2021). Furthermore, potential interaction



253 can be detected using spent medium growth assay, pair-wise growth experiments, and whole-  
254 genome metabolic modeling. Resource competition plays a major role in shaping bacterial  
255 communities, while metabolic exchanges promote group survival (Goldford et al., 2018; Zelezniak et  
256 al., 2015b). In the present study, we simulated the metabolic interactions using metabolic models  
257 and assessed their predictability using phenotypic assays. Both the metabolic model and the  
258 experiments suggested that the positive keystone species, Pan serves as a metabolic donor and  
259 supports the growth of other community members. On the contrary, the negative keystone species,  
260 Chr was the largest metabolic receiver in the community; it grew faster and accumulated higher  
261 growing capacity than other isolates except for Ent. Removal of this isolate decreased the metabolic  
262 resource overlap within the community, suggesting that it negatively affected community productivity  
263 through metabolic competition. These results indicate that metabolic interactions play a key role in  
264 determining the composition of communities, which is also observed in the maize model community  
265 (Krumbach et al., 2021). Importantly, five members of the SynCom were predicted to be donors by  
266 metabolic modeling, but only one species was experimentally confirmed in the applied experiments.  
267 This result could be attributed to the inherent uncertainty in genome-scale metabolic model  
268 reconstruction, such as the limited accuracy of genome annotation, the limitation of defined media,  
269 the lack of direct experimental measurements for most organisms, and the problems in network  
270 gap-filling (Bernstein et al., 2021). Thus, experimental data should be incorporated to curate the  
271 metabolic models.

272 One limitation of our study is the technical limitations to use identical media both for the biofilm  
273 experiments and during the metabolic assays. However, no biofilm is formed by these SynCom  
274 members in a minimal medium, while the metabolites exchange cannot be easily tested in a rich  
275 medium, like TSB. Nevertheless, the observed cross-feeding in the minimal medium is likely to  
276 occur in the biofilm, as reported in a dual-species biofilm community (Hansen et al., 2007).  
277 Furthermore, other mechanisms, such as nutrient availability, niche partitioning created by spatial  
278 and temporal heterogeneity, and trade-offs between nutrient acquisition and environmental  
279 tolerance, can also promote coexistence between species (Carlström et al., 2019; Estrela et al.,  
280 2021; Louca et al., 2018; Marchal et al., 2017). Various properties and mechanisms of bacterial  
281 interactions can be derived from the studies using model communities. For example, studies on the  
282 model Yeast-LAB community revealed that cross-feeding of amino acids might explain the co-  
283 existence of yeast and lactic acid bacteria in a variety of naturally fermented food and beverages  
284 (Ponomarova et al., 2017). Research on an SXMP soil community proposed the emergence of  
285 community intrinsic properties, such as enhanced biofilm formation and protection against grazing  
286 (Raghupathi et al., 2018; Ren et al., 2015). Further three-species biofilm community displayed  
287 enhanced resistance to antibiotics and SDS (Lee et al., 2014).

288 Although a potential practical application of the here developed SynCom is unclear, our research  
289 provides insights into how metabolic competition and cooperation simultaneously shape the  
290 community composition. The methodology of network co-occurrence analysis combined with qPCR  
291 quantification, metabolic modeling, and pair-wise interactions can be applied in diverse SynComs  
292 studies. Ultimately, such studies should translate to a deeper understanding of how microbial  
293 communities behave in their native environments, and this knowledge may be applied to  
294 wastewater treatment, disease suppression, and crop yield enhancement.

## 295 Materials and methods

### 296 Strains and genome sequencing

297 As shown in Table 1, eleven bacterial isolates derived from the cucumber rhizosphere (Sun et al.,  
298 2021) were selected for this study. These isolates were selected based on their co-existence in  
299 biofilms (see Results). Start inoculum was prepared by growing overnight culture in TSB medium,  
300 centrifuged (5,000g, 2 min), and resuspended in 0.9% NaCl solution to an optical density at 600 nm  
301 of one ( $OD_{600} \sim 1$ ). Multi-species start inoculum was prepared by mixing equal volumes of single-  
302 species initial inoculum.

Table 1. Strains used in this study

| Strain                                    | Abbreviation |
|-------------------------------------------|--------------|
| <i>Achromobacter denitrificans</i> XL100  | Ach          |
| <i>Acinetobacter baumannii</i> XL380      | Aci          |
| <i>Bacillus velenzensis</i> SQR9          | Bac          |
| <i>Burkholderia contaminans</i> XL73      | Bur          |
| <i>Chryseobacterium rhizoplanae</i> XL97  | Chr          |
| <i>Comamonas odontotermitis</i> WLL       | Com          |
| <i>Enterobacter bugandensis</i> XL95      | Ent          |
| <i>Pantoea eucrina</i> XL123              | Pan          |
| <i>Pseudomonas stutzeri</i> XL272         | Pse          |
| <i>Pseudoxanthomonas japonensis</i> XL7   | Pxa          |
| <i>Stenotrophomonas maltophilia</i> XL133 | Ste          |

303

304 The whole genomes of the selected isolates were sequenced by different companies at different  
305 times. The genomes of Aci, Com, Pxa, and Ste were sequenced using a combination of PacBio RS  
306 II and Illumina HiSeq 4000 sequencing platforms. The genome of Aci, Pxa, and Ste was sequenced  
307 at the Beijing Genomics Institute (BGI, Shenzhen, China). Four SMRT cells Zero-Mode Waveguide  
308 arrays of sequencing were used by the PacBio platform to generate the subreads set. PacBio  
309 subreads (length < 1 kb) were removed. The program Pbdagcon

310 (<https://github.com/PacificBiosciences/pbdagcon>) was used for self-correction. Draft genomic unitigs,  
311 which are uncontested groups of fragments, were assembled using the Celera Assembler against a  
312 high-quality corrected circular consensus sequence subreads set. To improve the accuracy of the  
313 genome sequences, GATK (<https://www.broadinstitute.org/gatk/>) and SOAP tool packages (SOAP2,  
314 SOAPsnp, SOAPindel) were used to make single-base corrections. To trace the presence of any  
315 plasmid, the filtered Illumina reads were mapped using SOAP to the bacterial plasmid database  
316 (<http://www.ebi.ac.uk/genomes/plasmid.html>, last accessed July 8, 2016). Raw sequencing data  
317 and the assembled genome have been deposited to the National Center for Biotechnology  
318 Information (NCBI) under the BioProject accession number PRJNA593376, PRJNA762936, and  
319 PRJNA762715. The genome of Com was sequenced at Majorbio Bio-Pharm Technology Co., Ltd.  
320 Raw sequencing data and the assembled genome have been deposited to the NCBI under the  
321 BioProject accession number PRJNA762695.

322 The genomes of Bur, Chr, Ent, and Pan were sequenced using PacBio Sequel platform and Illumina  
323 NovaSeq PE150 at the Beijing Novogene Bioinformatics Technology Co., Ltd. Raw sequencing data  
324 and the assembled genomes have been deposited to the NCBI under the BioProject accession  
325 number PRJNA593683, PRJNA721858, PRJNA761942, and PRJNA762676. Pse was sequenced  
326 by (Sun et al., 2021). Genomes were automatically annotated by NCBI PGAP.

### 327 [Soil community co-existence prediction](#)

328 To create a multi-species biofilm community, co-existence criterium was adopted. In parallel with  
329 our previous study (Sun et al., 2021), rhizosphere soil of cucumber soil was collected. Two types of  
330 soil were chosen: black soil and paddy soil. Bacterial abundance in the rhizosphere soil was roughly  
331 estimated by CFU counting on TSB agar plates. Equal volumes of soil suspension were mixed with  
332 *B. velezensis* SQR9 ( $OD_{600} \sim 1$ ) and inoculated in 2 ml of TSB liquid medium at a 1:100 ratio.  
333 Biofilms formed at the air-liquid interface and the solution underneath were collected separately  
334 after 24 h of incubation at 30°C. Each treatment had three biological replicates. The genomic DNA  
335 of the samples was extracted using an E.Z.N.A. Bacterial DNA Kit (Omega Bio-tek, Inc.) following  
336 the manufacturer's instructions. Universal primers targeting the V3-V4 regions of the 16S rRNA  
337 gene were used to construct the DNA library for sequencing. Paired-end sequencing of bacterial  
338 amplicons was performed on the Illumina MiSeq instrument (300 bp paired-end reads). Raw  
339 sequencing data have been deposited to the NCBI SRA database under BioProject accession  
340 number PRJNA739098. Reads were processed using the UPARSE pipeline  
341 ([http://drive5.com/usearch/manual/uparse\\_pipeline.html](http://drive5.com/usearch/manual/uparse_pipeline.html)). The raw sequences were first trimmed at  
342 a length of 250 bp using the "fastx\_truncate" command to discard shorter sequences. The paired-  
343 end reads were merged using the "fastq\_mergepairs" command (less than 3 mismatches). High-  
344 quality sequences were then selected using the "fastq\_filter" command (maximum error rate <  
345 0.5%), and dereplicated using the "derep\_fulllength" command. The singletons were removed using

346 “unoise3” algorithm and chimeric sequences were removed using “uchime\_ref” command with RDP  
347 database (RDP training set v16) ([https://www.drive5.com/usearch/manual/sintax\\_downloads.html](https://www.drive5.com/usearch/manual/sintax_downloads.html)).  
348 The remaining sequences were clustered to operational taxonomic units (OTUs) based on 97%  
349 sequence similarity. Taxonomy assignment of the OTUs was classified using “sintax” algorithm  
350 (confidence threshold 0.6) with the RDP database. Finally, a rarefied OTU table was created using  
351 the USEARCH “otutab\_norm” command at a depth of 10,000 reads per sample. The bacterial  
352 composition in the biofilm was visualized in Microsoft Office Excel 2019 to predict co-existence.

### 353 [Initial 11-species SynCom composition analysis](#)

354 The eleven-species biofilm was cultivated by mixing 4 ml of start inoculum (1%) with 400 ml of  
355 tryptic soy broth (TSB) and incubating at 30°C for two to eight days. Biofilms formed at the air-liquid  
356 interface were collected on days 2, 4, 6, and 8. Each time point had eight biological replicates. The  
357 genomic DNA of the biofilm samples was extracted as previously described. 16S rRNA gene  
358 amplicon sequencing was conducted and analyzed as described above. The difference in the  
359 analysis is that the generated sequences were not clustered and were directly used to create the  
360 amplicon sequence variant (ASV) table. Taxonomy of the ASVs was assigned to the species with a  
361 reference database consisting of the full 16S rRNA gene sequences of the eleven species. The  
362 ASVs were rarefied using the USEARCH “otutab\_rare” command at a depth of 10,000 reads per  
363 sample. The ASV table was provided as supplementary table. Microbial co-occurrence networks  
364 were constructed to show the interactions among species during biofilm development. Spearman  
365 correlations among all taxa were calculated using the R *psych* package. Only edges with correlation  
366 scores > 0.6 were kept ( $p < 0.05$ , FDR-adjusted). Correlation networks were visualized via Gephi  
367 using the Fruchterman Reingold layout (Bastian et al., 2009).

### 368 [Reduced SynComs biomass quantification](#)

369 The five- and six-species biofilms were grown in 6-well microtiter plates (VWR) insert with 100 µm  
370 sterile nylon mesh cell strainers (Biologix Cat #15-1100). 10 ml of TSB liquid medium and 100 µl of  
371 start inoculum were added. The plates were incubated for 24 h at 30 °C to allow the biofilm to grow  
372 on top of the nylon mesh cell strainer.

373 Biomass was defined by the fresh weight of biofilm. The cell strainer was taken out from the well,  
374 visible drops were removed with paper. Then the cell strainer was weighed. Pellicle fresh weight  
375 was the total weight minus the weight of the nylon mesh. Each treatment had six biological  
376 replicates.

### 377 [Reduced SynComs cell numbers quantification by qPCR](#)

378 Strain-specific primers were designed for the selected six isolates. Genome comparison was  
379 performed using Roary (Page et al., 2015) to find out strain-specific single-copy genes of each  
380 isolate. Primers were designed to target these genes. qPCR was used to evaluate the specificity of

381 the primers. Only primers that fulfill the following criteria were selected: (1) Selectively amplify target  
382 isolate but do not amplify noncognate isolates. (2) The CT values are low for targeting isolates,  
383 while high for non-targeting isolates. The CT values for non-targeting isolates are similar to that of  
384 water. (3) The melting curves display one peak for targeting isolates. The amplified fragments were  
385 ligated to PMD19T plasmids. Standard curves were generated using the plasmids containing  
386 corresponding fragments as templates. Detailed information on primers was provided in  
387 Supplementary information S1.

388 To quantify the cell numbers of each isolate within the reduced biofilms, 100  $\mu$ l of the start inoculum  
389 was grown in six-well microtiter plates (VWR) with 10 ml TSB medium. A 100  $\mu$ m sterile nylon mesh  
390 cell strainer and a Spectra Mesh Woven Filter (Fisher Scientific, Spectrum 146488) were put inside.  
391 The mesh was manually cut into 1.5 cm<sup>2</sup> squares and autoclaved. The mesh ensured equal  
392 sampling of biofilm. After 24 or 36 h of pellicle development, the nylon mesh cell strainer was taken  
393 out, the inner filter was transferred to a 1.5 ml microcentrifuge tube, stored at -80 °C for following  
394 DNA extraction. The genomic DNA of the biofilm samples was extracted as previously described.  
395 qPCR was performed with Applied Biosystems Real-Time PCR Instrument. Reaction components  
396 are as follows 7.2  $\mu$ l H<sub>2</sub>O, 10  $\mu$ l 2 $\times$  ChamQ SYBR qPCR Master Mix (Vazyme), 0.4  $\mu$ l 10  $\mu$ M of each  
397 primer and 2  $\mu$ l template DNA. The PCR programs were carried out under the following conditions:  
398 95 °C for 10 min, 40 cycles of 95 °C for 30 s, 60 °C for 45 s, followed by a standard melting curve  
399 segment. Each treatment had six biological replicates, and each sample was run in triplicates  
400 (technical replicates).

#### 401 **Pair-wise assay**

402 The direct competition of these isolates against each other was evaluated using the spot-on-lawn  
403 assay and the pair-wise spot assay. Spot-on-lawn assay: 5 ml of lawn species (OD<sub>600</sub> ~ 0.02) grown  
404 in TSB medium was spread onto a 25 ml TSB plate (1.5% agar) and removed by pipetting. Plates  
405 were dried for 20 min. 5  $\mu$ l of spot species (OD<sub>600</sub> ~ 0.4) grown in TSB medium was spotted on the  
406 center of the plates. Pair-wise spot assay: 5  $\mu$ l of the dual-species (OD<sub>600</sub> ~ 1) grown in TSB medium  
407 were spotted on the TSB plate (1.5% agar) at 5 mm between the center of each colony. Plates were  
408 grown at 30 °C and imaged at 48 h. The experiments were performed twice, each experiment had  
409 three replicate plates.

#### 410 **Growth curve assay**

411 Growth in the TSB medium was evaluated by growth curve assay. 2  $\mu$ l of isolates (OD<sub>600</sub> ~1) was  
412 inoculated to 200  $\mu$ l TSB medium in a 10 $\times$ 10 well Honeycomb Microplate. OD<sub>600</sub> was measured  
413 every 30 minutes at 30 °C with Bioscreen C Automated Microbiology Growth Curve Analysis  
414 System. The growth was measured for 24 hours. Each treatment has five replicates.

415 The potential growth promotion of the bacterial metabolites to another species was evaluated using  
416 a spent medium growth curve assay. Donor bacteria were grown in the M9 medium with 0.2%  
417 glucose till the glucose was under detection. The consumption of glucose was measured using the  
418 Glucose GO Assay Kit (Sigma). The cell culture was spun down, then the spent medium was filter-  
419 sterilized and directly used as the medium of growth curve assay. 2  $\mu$ l of recipient species ( $OD_{600} \sim 1$ )  
420 was inoculated to 200  $\mu$ l spent medium or M9 glucose medium in a 10 $\times$ 10 well Honeycomb  
421 Microplate.  $OD_{600}$  was measured every 30 minutes at 30 °C for 48 hours. Each treatment has five  
422 replicates. The carrying capacity (maximum population size) was compared.

### 423 [Genome-scale metabolic modeling](#)

424 Metabolic model of the six-species reduced SynCom was reconstructed using the CarveMe pipeline  
425 (Machado et al., 2018). The M9 glucose medium was used as input medium for reconstructing  
426 genome-scale metabolic models. The quality of the metabolic models was validated using MEMOTE  
427 (Lieven et al., 2020). The metabolic interaction potential and metabolic resource overlap for each  
428 community were analyzed using SMETANA (Zelezniak et al., 2015; Zorrilla et al., 2021). The  
429 simulated cross-feeding results were summarized as SMETANA score, which estimates the  
430 strength of metabolic exchanging (Zelezniak et al., 2015).

### 431 [Carbon source metabolic activity measurement](#)

432 PM1 (BIOLOG Cat #13101) and PM2 (BIOLOG Cat #13102) phenotypic microarrays were used to  
433 assess the carbon source utilization ability of the community members (Bochner et al., 2001). The  
434 assays were performed following the manufacturer's instructions. Briefly, 100  $\mu$ l of diluted cell  
435 suspension of each species mixed with the BiOLOG redox dyes were added to each well of the PM  
436 plates. Water mixed with dyes were used as negative controls. All of the plates were then incubated  
437 at 30 °C for up to 48 h. If the species could utilize the carbon source in a well, the colorless  
438 tetrazolium dye will be reduced to purple formazan by cell respiration. The color changes were  
439 measured by an endpoint absorbance at 590 nm with a microplate reader. The variable level of  
440 color changes indicates the carbon source metabolic activity.

### 441 [Data analysis and figures](#)

442 All the data needed to evaluate the conclusions in this paper are provided in the figures. Source  
443 data related to this paper would be available online upon publication. Data were analyzed using R  
444 v4.1.3 (R Core Team, 2022) in the RStudio v2022.02.0+443. Statistical analysis methods were  
445 described in figure legends. Plots were generated using Microsoft Office Excel 2019 (stacked bar  
446 plot), R *ggplot2* (Wickham, 2016), *ggpubr* (Kassambara, 2020), *ggalluvial* (Brunson JC, 2020),  
447 *pheatmap* (Kolde, 2019) packages, and Adobe Illustrator CC 2020 (Adobe Inc.). Schematic  
448 diagrams were generated using BioRender (<https://biorender.com/>).

449

## 450 Acknowledgments

451 This work was financially supported by the National Nature Science Foundation of China (31972506,  
452 31972512 and 42090064), the National Key Research and Development Program  
453 (2022YFF1001800, 2021YFD1900300 and 2022YFD1500041). XS was supported by a Chinese  
454 Scholarship Council fellowship. ÁTK was supported by the Danish National Research Foundation  
455 (DNRF137) for the Center for Microbial Secondary Metabolites and the Novo Nordisk Foundation  
456 via the INTERACT project (grant number NNF19SA0059360). During her unexpected trap in  
457 Denmark caused by the pandemic of Omicron, author XS is extremely grateful to ZX for his financial  
458 support, and to Danish guitarist Niklas Johansen for his weekly lessons and constant spiritual  
459 support.

## 460 Competing Interests

461 The authors declare that there are no competing financial interests related to the work described.

## 462 Author contributions

463 XS, JX, QH, ZX, ÁTK designed the study, XS, JX, RX performed the experiments. DZ, WX, WW  
464 performed the metabolic modeling. XS and JX analyzed the data and created the figures. XS wrote  
465 the first draft of the manuscript, ZX, ÁTK, RZ, QS revised the manuscript.

## 466 References

- 467 Agler MT, Ruhe J, Kroll S, Morhenn C, Kim ST, Weigel D, Kemen EM. 2016. Microbial Hub Taxa  
468 Link Host and Abiotic Factors to Plant Microbiome Variation. *PLoS Biol* **14**:e1002352.  
469 doi:10.1371/journal.pbio.1002352
- 470 Bai Y, Müller DB, Srinivas G, Garrido-Oter R, Potthoff E, Rott M, Dombrowski N, Münch PC,  
471 Spaepen S, Remus-Emsermann M, Hüttel B, McHardy AC, Vorholt JA, Schulze-Lefert P. 2015.  
472 Functional overlap of the Arabidopsis leaf and root microbiota. *Nature* **528**:364–369.  
473 doi:10.1038/nature16192
- 474 Barberán A, Bates ST, Casamayor EO, Fierer N. 2012. Using network analysis to explore co-  
475 occurrence patterns in soil microbial communities. *ISME J* **6**:343–351.  
476 doi:10.1038/ismej.2011.119
- 477 Bengtsson-Palme J. 2020. Microbial model communities: to understand complexity, harness the  
478 power of simplicity. *Comput Struct Biotechnol J* **18**:3987–4001. doi:10.1016/j.csbj.2020.11.043
- 479 Berg M, Koskella B. 2018. Nutrient- and Dose-Dependent Microbiome-Mediated Protection against  
480 a Plant Pathogen. *Curr Biol* **28**:2487-2492.e3. doi:10.1016/j.cub.2018.05.085

- 481 Bernstein DB, Sulheim S, Almaas E, Segrè D. 2021. Addressing uncertainty in genome-scale  
482 metabolic model reconstruction and analysis. *Genome Biol* **22**:64. doi:10.1186/S13059-021-  
483 02289-Z
- 484 Blasche S, Kim Y, Oliveira AP, Patil KR. 2017. Model microbial communities for ecosystems biology.  
485 *Curr Opin Syst Biol* **6**:51–57. doi:10.1016/j.coisb.2017.09.002
- 486 Brunson JC RQ. 2020. “ggalluvial: Alluvial Plots in ‘ggplot2’.” R package version 0.12.3.  
487 <http://corybrunson.github.io/ggalluvial/>
- 488 Burman E, Bengtsson-Palme J. 2021. Microbial Community Interactions Are Sensitive to Small  
489 Changes in Temperature. *Front Microbiol* **12**. doi:10.3389/FMICB.2021.672910
- 490 Carlström CI, Field CM, Bortfeld-Miller M, Müller B, Sunagawa S, Vorholt JA. 2019. Synthetic  
491 microbiota reveal priority effects and keystone strains in the Arabidopsis phyllosphere. *Nat Ecol*  
492 *Evol* **3**:1445–1454. doi:10.1038/s41559-019-0994-z
- 493 Cavaliere M, Feng S, Soyer OS, Jiménez JI. 2017. Cooperation in microbial communities and their  
494 biotechnological applications. *Environ Microbiol* **19**:2949–2963. doi:10.1111/1462-2920.13767
- 495 Cho I, Blaser MJ. 2012. The human microbiome: at the interface of health and disease. *Nat Rev*  
496 *Genet* **13**:260–270. doi:10.1038/nrg3182
- 497 Durán P, Thiergart T, Garrido-Oter R, Agler M, Kemen E, Schulze-Lefert P, Hacquard S. 2018.  
498 Microbial interkingdom interactions in roots promote Arabidopsis survival. *Cell* **175**:973–983.  
499 doi:10.1016/j.cell.2018.10.020
- 500 Estrela S, Sanchez-Gorostiaga A, Vila JCC, Sanchez A. 2021. Nutrient dominance governs the  
501 assembly of microbial communities in mixed nutrient environments. *Elife* **10**:e65948.  
502 doi:10.1101/2020.08.06.239897
- 503 Faust K. 2021. Open challenges for microbial network construction and analysis. *ISME J* **15**:3111–  
504 3118. doi:10.1038/s41396-021-01027-4
- 505 Fitzpatrick CR, Salas-González I, Conway JM, Finkel OM, Gilbert S, Russ D, Teixeira PJPL, Dangl  
506 JL, Pereira PJ, Teixeira L, Dangl JL. 2020. The Plant Microbiome: From Ecology to  
507 Reductionism and beyond. *Annu Rev Microbiol* **74**:81–100. doi:10.1146/annurev-micro-  
508 022620-014327
- 509 Flemming HC, Wingender J, Szewzyk U, Steinberg P, Rice SA, Kjelleberg S. 2016. Biofilms: An  
510 emergent form of bacterial life. *Nat Rev Microbiol* **14**:563–575. doi:10.1038/nrmicro.2016.94
- 511 Flemming HC, Wuertz S. 2019. Bacteria and archaea on Earth and their abundance in biofilms. *Nat*  
512 *Rev Microbiol* **17**:247–260. doi:10.1038/s41579-019-0158-9



- 513 Gao CH, Cao H, Cai P, Sørensen SJ. 2021. The initial inoculation ratio regulates bacterial coculture  
514 interactions and metabolic capacity. *ISME J* **15**:29–40. doi:10.1038/s41396-020-00751-7
- 515 Goldford JE, Lu N, Bajić D, Estrela S, Tikhonov M, Sanchez-Gorostiaga A, Segrè D, Mehta P,  
516 Sanchez A. 2018. Emergent simplicity in microbial community assembly. *Science* **361**:469–474.
- 517 Gómez-Godínez LJ, Martínez-Romero E, Banuelos J, Arteaga-Garibay RI. 2021. Tools and  
518 challenges to exploit microbial communities in agriculture. *Curr Res Microb Sci* **2**:100062.  
519 doi:10.1016/j.crmicr.2021.100062
- 520 Großkopf T, Soyer OS. 2014. Synthetic microbial communities. *Curr Opin Microbiol* **18**:72–77.  
521 doi:10.1016/J.MIB.2014.02.002
- 522 Hansen SK, Rainey PB, Haagenen JAJ, Molin S. 2007. Evolution of species interactions in a  
523 biofilm community. *Nature* **445**:533–536. doi:10.1038/nature05514
- 524 Hromada S, Qian Y, Jacobson TB, Clark RL, Watson L, Safdar N, Amador-Noguez D, Venturelli OS.  
525 2021. Negative interactions determine *Clostridioides difficile* growth in synthetic human gut  
526 communities. *Mol Syst Biol* **17**. doi:10.15252/msb.202110355
- 527 Kassambara A. 2020. ggpubr: 'ggplot2' Based Publication Ready Plots. R package version 0.4.0.  
528 <https://cran.r-project.org/package=ggpubr>
- 529 Kehe J, Ortiz A, Kulesa A, Gore J, Blainey PC, Friedman J. 2021. Positive interactions are common  
530 among culturable bacteria. *Sci Adv* **7**:7159. doi:10.1126/SCIADV.ABI7159
- 531 Kolde R. 2019. pheatmap: Pretty Heatmaps. R package version 1.0.12. [https://cran.r-](https://cran.r-project.org/package=pheatmap)  
532 [project.org/package=pheatmap](https://cran.r-project.org/package=pheatmap)
- 533 Krumbach J, Kroll P, Wewer V, Metzger S, Ischebeck T, Jacoby RP. 2021. Metabolic analysis of a  
534 bacterial synthetic community from maize roots provides new mechanistic insights into  
535 microbiome stability. *bioRxiv* 2021.11.28.470254.
- 536 Lee KWK, Periasamy S, Mukherjee M, Xie C, Kjelleberg S, Rice SA. 2014. Biofilm development and  
537 enhanced stress resistance of a model, mixed-species community biofilm. *ISME J* **8**:894–907.  
538 doi:10.1038/ismej.2013.194
- 539 Liu W, Jacquiod S, Brejnrod A, Russel J, Burmølle M, Sørensen SJ. 2019. Deciphering links  
540 between bacterial interactions and spatial organization in multispecies biofilms. *ISME J*  
541 **13**:3054–3066. doi:10.1038/s41396-019-0494-9

- 542 Louca S, Polz MF, Mazel F, Albright MBN, Huber JA, O'Connor MI, Ackermann M, Hahn AS,  
543 Srivastava DS, Crowe SA, Doebeli M, Parfrey LW. 2018. Function and functional redundancy  
544 in microbial systems. *Nat Ecol Evol* **2**:936–943. doi:10.1038/s41559-018-0519-1
- 545 Lozano GL, Bravo JI, Garavito Diago MF, Park HB, Hurley A, Peterson SB, Stabb E V., Crawford  
546 JM, Broderick NA, Handelsman J. 2019. Introducing THOR, a model microbiome for genetic  
547 dissection of community behavior. *MBio* **10**. doi:10.1128/MBIO.02846-  
548 18/SUPPL\_FILE/MBIO.02846-18-ST003.DOCX
- 549 Ma K-W, Niu Y, Jia Y, Ordon J, Copeland C, Emonet A, Geldner N, Guan R, Stolze SC, Nakagami  
550 H, Garrido-Oter R, Schulze-Lefert P. 2021. Coordination of microbe–host homeostasis by  
551 crosstalk with plant innate immunity. *Nat Plants* **7**:814–825. doi:10.1038/s41477-021-00920-2
- 552 Madsen JS, Røder HL, Russel J, Sørensen H, Burmølle M, Sørensen SJ. 2016. Coexistence  
553 facilitates interspecific biofilm formation in complex microbial communities. *Environ Microbiol*  
554 **18**:2565–2574. doi:10.1111/1462-2920.13335
- 555 Marchal M, Goldschmidt F, Derksen-Müller SN, Panke S, Ackermann M, Johnson DR. 2017. A  
556 passive mutualistic interaction promotes the evolution of spatial structure within microbial  
557 populations. *BMC Evol Biol* **17**. doi:10.1186/s12862-017-0950-y
- 558 Nadell CD, Drescher K, Foster KR. 2016. Spatial structure, cooperation and competition in biofilms.  
559 *Nat Rev Microbiol* **14**:589–600. doi:10.1038/nrmicro2016.84
- 560 Nielsen AT, Tolker-Nielsen T, Barken KB, Molin S. 2000. Role of commensal relationships on the  
561 spatial structure of a surface-attached microbial consortium. *Environ Microbiol* **2**:59–68.  
562 doi:10.1046/j.1462-2920.2000.00084.x
- 563 Niu B, Paulson JN, Zheng X, Kolter R. 2017. Simplified and representative bacterial community of  
564 maize roots. *Proc Natl Acad Sci U S A* **114**:E2450–E2459. doi:10.1073/pnas.1616148114
- 565 Orazi G, O'toole GA. 2019. “It Takes a Village”: Mechanisms Underlying Antimicrobial Recalcitrance  
566 of Polymicrobial Biofilms. *J Bacteriol* **202**:e00530-19. doi:10.1128/JB.00530-19
- 567 Ortiz A, Vega NM, Ratzke C, Gore J. 2021. Interspecies bacterial competition regulates community  
568 assembly in the *C. elegans* intestine. *ISME J* **15**:2131–2145. doi:10.1038/s41396-021-00910-4
- 569 Piccardi P, Vessman B, Mitri S. 2019. Toxicity drives facilitation between 4 bacterial species. *Proc*  
570 *Natl Acad Sci U S A* **116**:15979–15984. doi:10.1073/pnas.1906172116
- 571 Ponomarova O, Gabrielli N, Sévin DC, Mülleder M, Zirngibl K, Bulyha K, Andrejev S, Kafkia E,  
572 Typas A, Sauer U, Ralser M, Patil KR. 2017. Yeast Creates a Niche for Symbiotic Lactic Acid  
573 Bacteria through Nitrogen Overflow. *Cell Syst* **5**:345-357.e6. doi:10.1016/J.CELS.2017.09.002

- 574 Poudel R, Jumpponen A, Schlatter DC, Paulitz TC, McSpadden Gardener BB, Kinkel LL, Garrett KA.  
575 2016. Microbiome networks: A systems framework for identifying candidate microbial  
576 assemblages for disease management. *Phytopathology* **106**:1083–1096. doi:10.1094/PHYTO-  
577 02-16-0058-FI
- 578 R Core Team. 2022. R: A language and environment for statistical computing. R Foundation for  
579 Statistical Computing, Vienna, Austria. <https://www.r-project.org/>.
- 580 Raghupathi PK, Liu W, Sabbe K, Houf K, Burmølle M, Sørensen SJ. 2018. Synergistic interactions  
581 within a multispecies biofilm enhance individual species protection against grazing by a pelagic  
582 protozoan. *Front Microbiol* **8**. doi:10.3389/fmicb.2017.02649
- 583 Ratzke C, Barrere J, Gore J. 2020. Strength of species interactions determines biodiversity and  
584 stability in microbial communities. *Nat Ecol Evol* **4**:376–383. doi:10.1038/s41559-020-1099-4
- 585 Ren D, Madsen JS, Sørensen SJ, Burmølle M. 2015. High prevalence of biofilm synergy among  
586 bacterial soil isolates in cocultures indicates bacterial interspecific cooperation. *ISME J* **9**:81–  
587 89. doi:10.1038/ismej.2014.96
- 588 Schmitz L, Yan Z, Schneijderberg M, de Roij M, Pijnenburg R, Zheng Q, Franken C, Dechesne A,  
589 Trindade LM, van Velzen R, Bisseling T, Geurts R, Cheng X. 2022. Synthetic bacterial  
590 community derived from a desert rhizosphere confers salt stress resilience to tomato in the  
591 presence of a soil microbiome. *ISME J* **2022** **16**:1907–1920. doi:10.1038/s41396-022-01238-3
- 592 Sun X, Xu Z, Xie J, Hesselberg-Thomsen V, Tan T, Zheng D, Strube ML, Dragoš A, Shen Q, Zhang  
593 R, Kovács ÁT. 2021. *Bacillus velezensis* stimulates resident rhizosphere *Pseudomonas*  
594 *stutzeri* for plant health through metabolic interactions. *ISME J* **16**:774–787.  
595 doi:10.1038/s41396-021-01125-3
- 596 Vlamakis H, Chai Y, Beaugard P, Losick R, Kolter R. 2013. Sticking together: Building a biofilm  
597 the *Bacillus subtilis* way. *Nat Rev Microbiol* **11**:157–168. doi:10.1038/nrmicro2960
- 598 Voges MJEEE, Bai Y, Schulze-Lefert P, Sattely ES. 2019. Plant-derived coumarins shape the  
599 composition of an *Arabidopsis* synthetic root microbiome. *Proc Natl Acad Sci U S A*  
600 **116**:12558–12565. doi:10.1073/pnas.1820691116
- 601 Wang C, Li Y, Li M, Zhang K, Ma W, Zheng L, Xu H, Cui B, Liu R, Yang Y, Zhong Y, Liao H. 2021.  
602 Functional assembly of root-associated microbial consortia improves nutrient efficiency and  
603 yield in soybean. *J Integr Plant Biol* **63**:1021–1035. doi:10.1111/JIPB.13073
- 604 Webb JS, Givskov M, Kjelleberg S. 2003. Bacterial biofilms: Prokaryotic adventures in  
605 multicellularity. *Curr Opin Microbiol* **6**:578–585. doi:10.1016/j.mib.2003.10.014

- 606 Wei Z, Gu Y, Friman VP, Kowalchuk GA, Xu Y, Shen Q, Jousset A. 2019. Initial soil microbiome  
607 composition and functioning predetermine future plant health. *Sci Adv* **5**:759–784.  
608 doi:10.1126/sciadv.aaw0759
- 609 Weiss AS, Burcher AG, Chakravarthy A, Raj D, Von Stempel A, Meng C, Kleigrewe K, Münch PC,  
610 Rössler L, Huber C, Eisenreich W, Jochum LM, Göing S, Jung K, Lincetto C, Hübner J,  
611 Marinos G, Zimmermann J, Kaleta C, Sanchez A, Stecher B. 2021. In vitro interaction network  
612 of a synthetic gut bacterial community. *ISME J* **16**:1095–1109. doi:10.1038/s41396-021-01153-  
613 z
- 614 Wickham H. 2016. ggplot2: Elegant Graphics for Data Analysis. *Springer-Verlag New York*.  
615 <https://ggplot2.tidyverse.org>
- 616 Wolfe BE, Button JE, Santarelli M, Dutton RJ. 2014. Cheese rind communities provide tractable  
617 systems for in situ and in vitro studies of microbial diversity. *Cell* **158**:422–433.  
618 doi:10.1016/J.CELL.2014.05.041
- 619 Zelezniak A, Andrejev S, Ponomarova O, Mende DR, Bork P, Patil KR. 2015a. Metabolic  
620 dependencies drive species co-occurrence in diverse microbial communities. *Proc Natl Acad*  
621 *Sci* **112**:6449–6454. doi:10.1073/PNAS.1421834112
- 622 Zelezniak A, Andrejev S, Ponomarova O, Mende DR, Bork P, Patil KR. 2015b. Metabolic  
623 dependencies drive species co-occurrence in diverse microbial communities. *Proc Natl Acad*  
624 *Sci U S A* **112**:6449–6454. doi:10.1073/pnas.1421834112
- 625 Zorrilla F, Buric F, Patil KR, Zelezniak A. 2021. metaGEM: reconstruction of genome scale  
626 metabolic models directly from metagenomes. *Nucleic Acids Res* **49**:e126.  
627 doi:10.1093/NAR/GKAB815
- 628
- 629
